# Supplementary material for: p–(p,π*) interaction mechanism revealing and accordingly designed new member in deep-ultraviolet NLO borates LinMn−1B2n−1O4n−2(M = Cs/Rb, n = 3, 4, 6)
Source: Royal Society of Chemistry journal article supplement (doi:10.1039/c4tc00363b), 2014-01-01
Supplement: c4tc00363b1.pdf [file c4tc00363b1.pdf]

## **$p$ -( $p,\pi^*$ ) Interaction Mechanism Revealing and Accordingly Designed New Member in Deep-Ultraviolet NLO Materials $\text{Li}_n\text{M}_{n-1}\text{B}_{2n-1}\text{O}_{4n-2}$ ( $\text{M}=\text{Cs}/\text{Rb}$ , $n=3, 4, 6$ )**

Bingbing Zhang,<sup>a,b</sup> Zhihua Yang,<sup>\*a</sup> Yun Yang,<sup>\*a</sup> Ming-Hsien Lee,<sup>c</sup> Shilie Pan,<sup>\*a</sup> Qun Jing,<sup>a,b</sup> and Xin Su<sup>a,b</sup>

<sup>a</sup>Key Laboratory of Functional Materials and Devices for Special Environments of CAS; Xinjiang Key Laboratory of Electronic Information Materials and Devices; Xinjiang Technical Institute of Physics & Chemistry of CAS, 40-1 South Beijing Road, Urumqi 830011, China.

<sup>b</sup>University of Chinese Academy of Sciences, Beijing 100049, China;

<sup>c</sup>Department of Physics, Tamkang University, Taipei 25137, Taiwan

To whom correspondence should be addressed.

E-mail: zhyang@ms.xjb.ac.cn (Zhihua Yang), sspan@ms.xjb.ac.cn (Shilie Pan), yangyun@ms.xjb.ac.cn (Yun Yang)

Tel: (86)-991- 3810816

Fax: (86)-991-3838957

### **Electronic Supplementary Information:**

**Figure S1.** Band structures of L3CBO, L4CBO, L6RBO, and L4RBO calculated along selected high symmetry k-points.

**Figure S2.** UV-Vis-IR diffuse reflectance spectrum of L3CBO, L4CBO, L6RBO, and L4RBO. Optical band gaps for L3CBO, L4CBO, L6RBO, and L4RBO are obtained by the extrapolation method.

**Figure S3.** The comparison between PDOS and band-resolved  $\chi^{(2)}$  of (a) L3CBO, (b) L4RBO, (c) L6RBO. The energy ranges of the specific orbitals in L3CBO are marked in (d) for the further analyses.

**Figure S4.** Some representative orbital shapes in these six regions. Orbital N represents the  $N_{\text{th}}$  band. The eigenvalues of each orbital was marked in Figure S3d from the lowest value of the energy of the band at any k-point to the highest value of the energy of the band at any k-point.

**Figure S5.** The PDOS of off-ring and in-ring O atoms in L3CBO. The off-ring O atoms have more non-bonding  $2p$  states than that of the in-ring O atoms.

**Figure S6.** The SHG-density of occupied states and unoccupied states of L6RBO in the VE process.

**Figure S7.** The SHG-density of occupied states and unoccupied states of L3CBO in the VE process.

**Figure S8.** The SHG-density of occupied states and unoccupied states of L4RBO in the VE process.

**Figure S9.** Coordination of oxygen atoms around Li and Rb.

**Figure S10.** The IR spectrum of L4RBO.

**Figure S11.** TG/DSC curve of L4RBO.

**Figure S12.** Experimental and calculated XRD patterns of L4RBO compared with the pattern after melting.

**Figure S13.** The charge distribution of B (green) and O (red) atoms of isolated  $B_7O_{14}$  group in L4CBO (top) and L4RBO (bottom) as well as the related dipole moment.

**Table S1.** Atomic coordinates and equivalent isotropic displacement parameters for L4RBO.  $U_{eq}$  is defined as one third of the trace of the orthogonalized  $U_{ij}$  tensor.

**Table S2.** Bond lengths and angles for L4RBO.

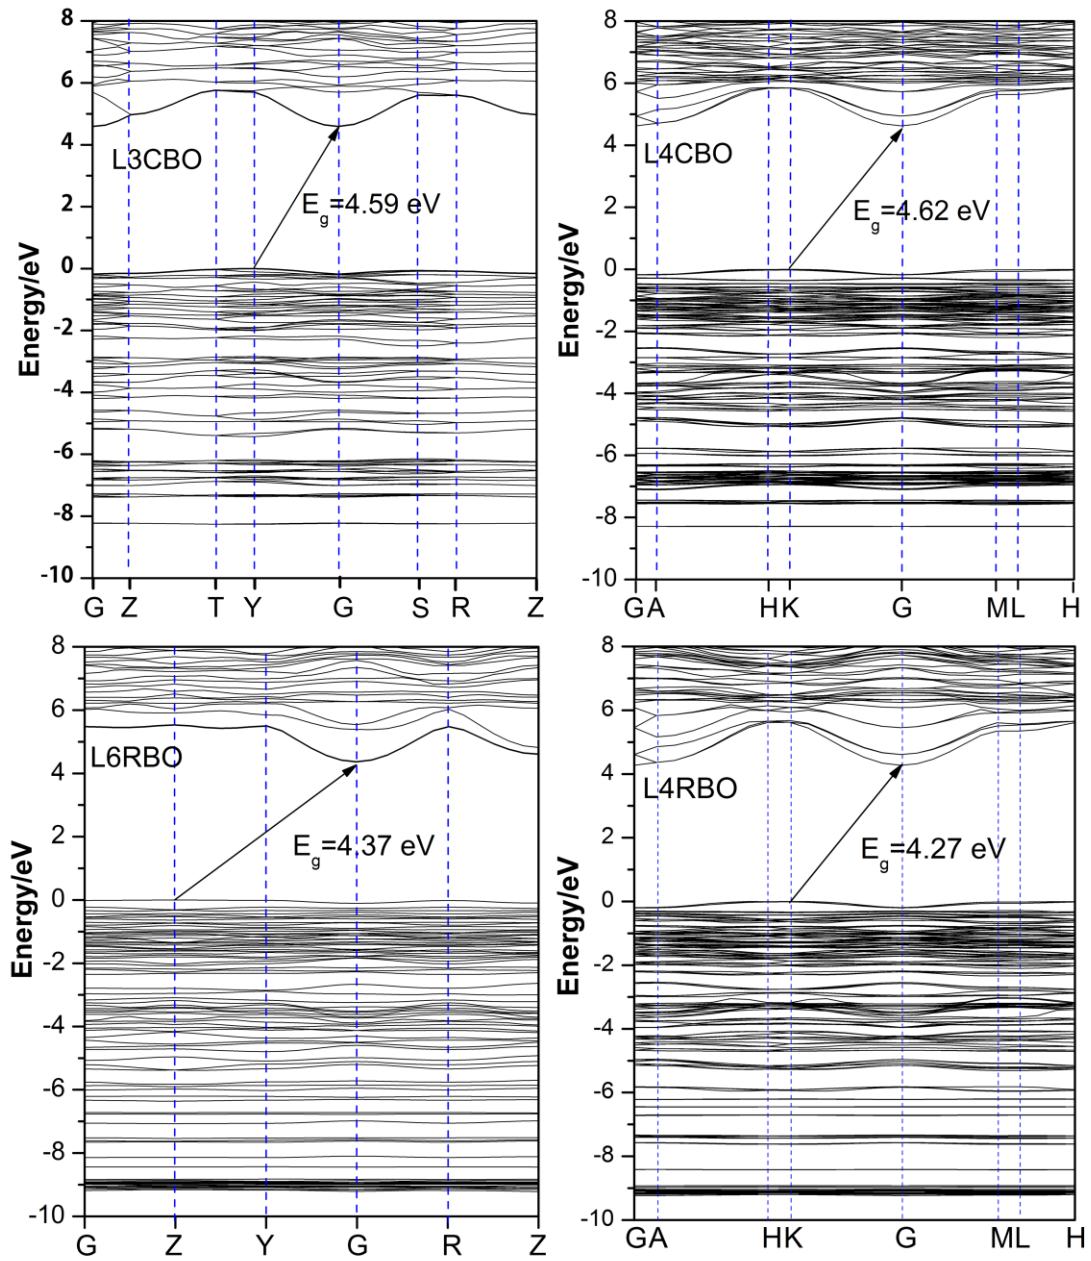

**Figure S1.** Band structures of L3CBO, L4CBO, L6RBO, and L4RBO calculated along selected high symmetry k-points. Their band structures are qualitatively similar to one another with indirect band gap.

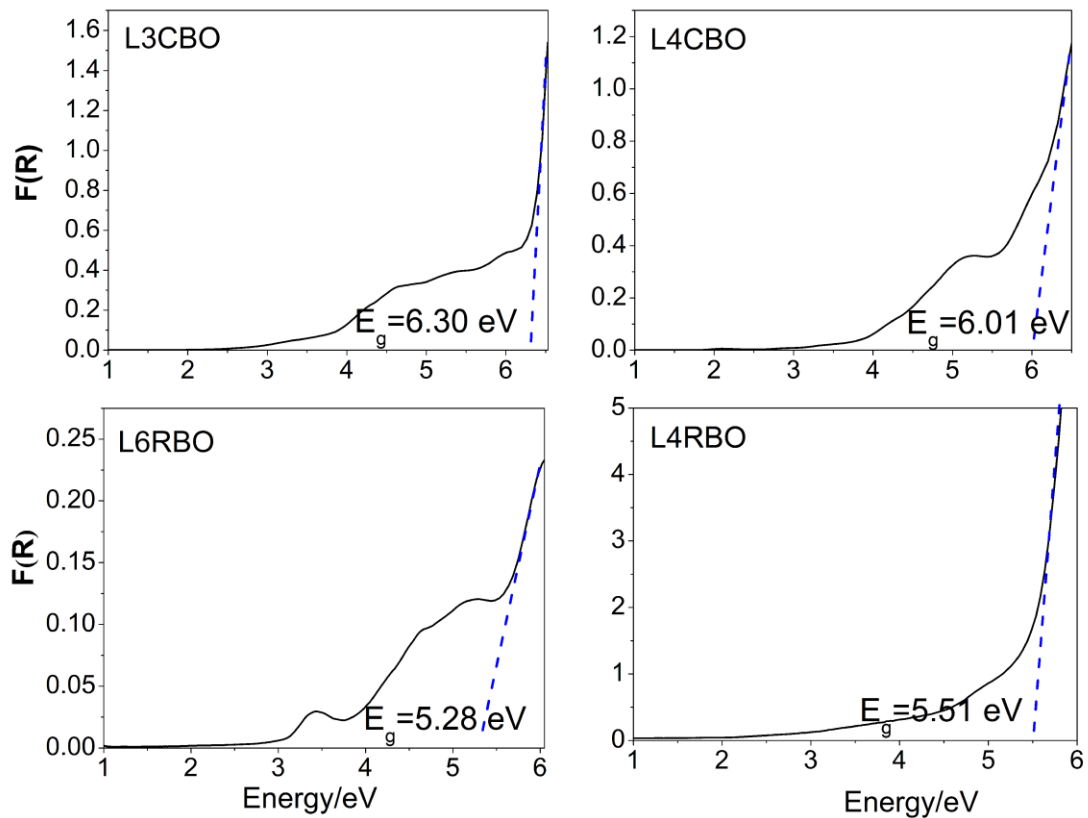

**Figure S2.** UV-Vis-IR diffuse reflectance spectrum of L3CBO, L4CBO, L6RBO, and L4RBO. Optical band gaps for L3CBO, L4CBO, L6RBO, and L4RBO are obtained by the extrapolation method.<sup>1</sup>

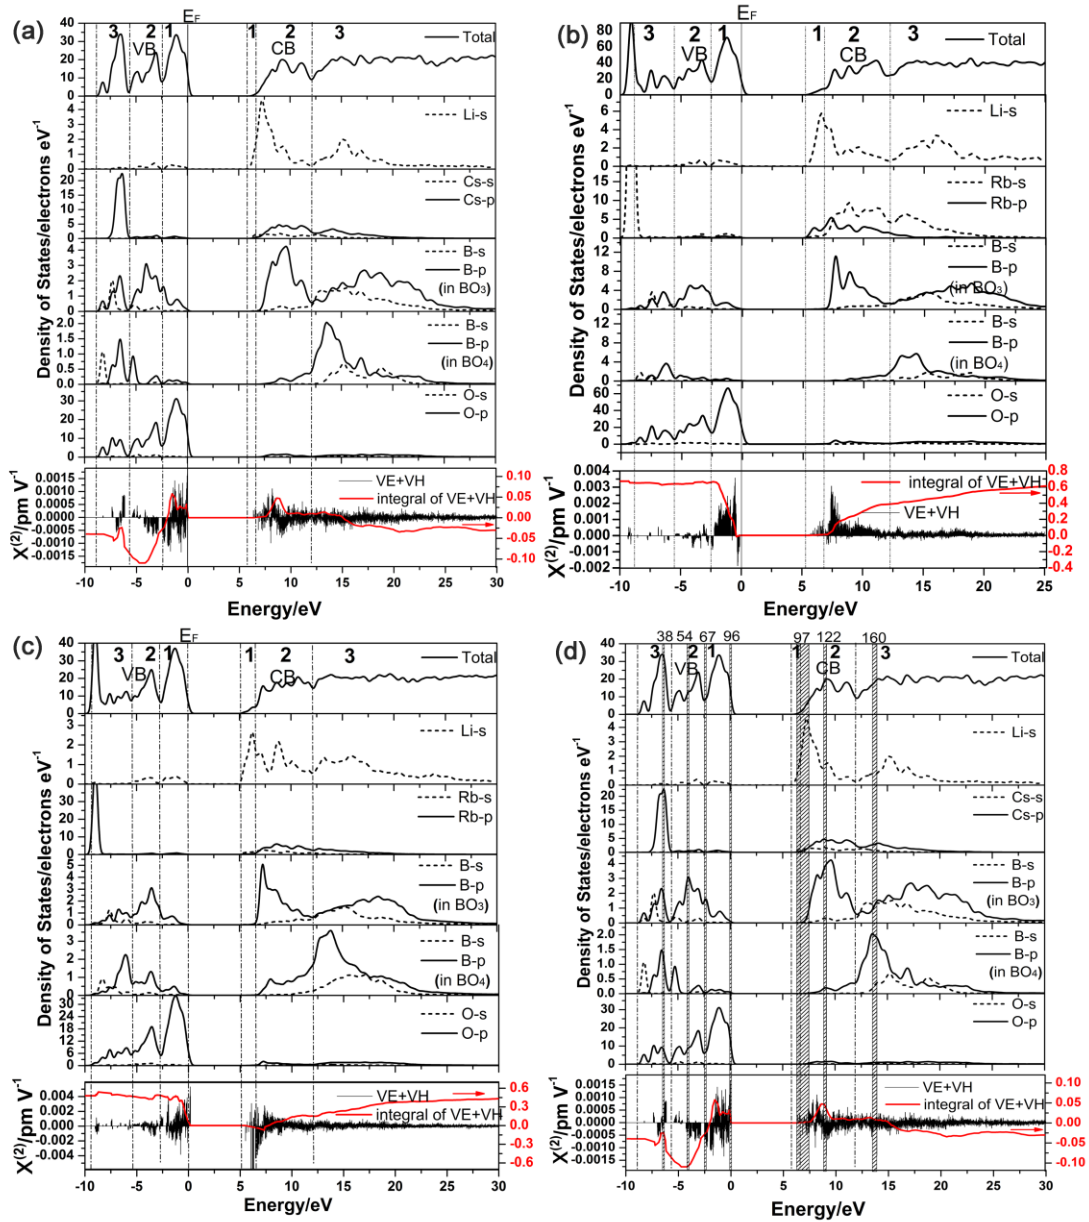

**Figure S3.** The comparison between PDOS and band-resolved  $\chi^{(2)}$  of (a) L3CBO, (b) L4RBO, (c) L6RBO. The energy ranges of the specific orbitals in L3CBO are marked in (d) for the further analyses.

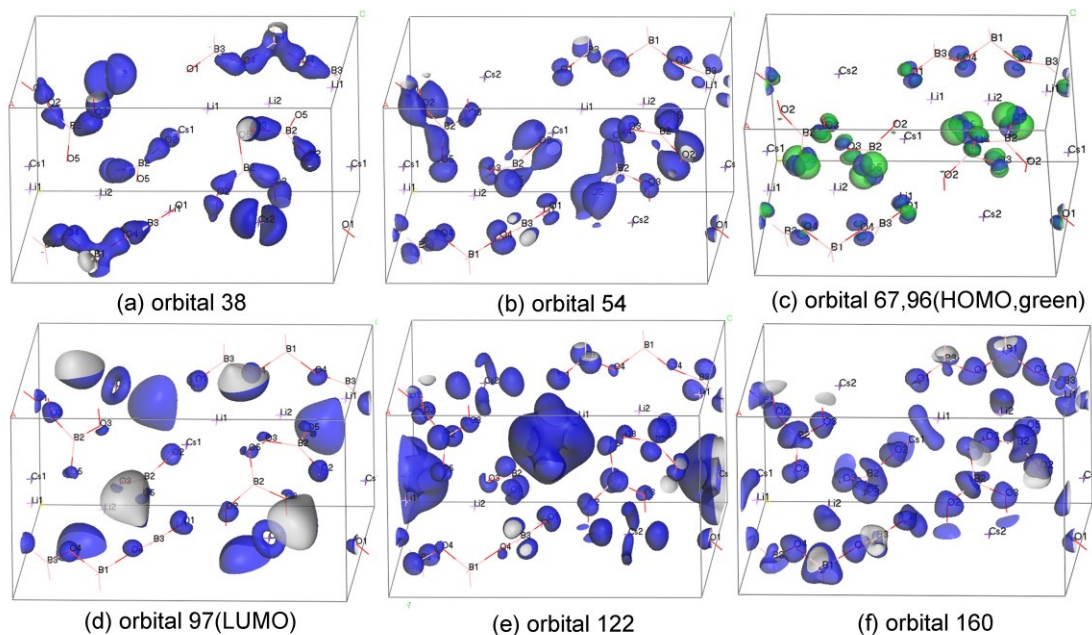

**Figure S4.** Some representative orbital shapes in these six regions. Orbital N represents the Nth band. The eigenvalues of each orbital was marked in Figure S3d from the lowest value of the energy of the band at any k-point (in eV) to the highest value of the energy of the band at any k-point (in eV).

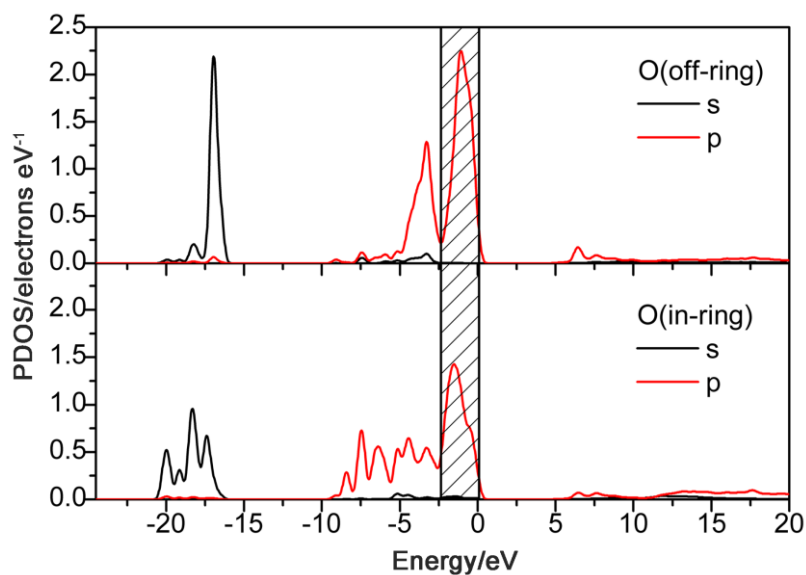

**Figure S5.** The PDOS of off-ring and in-ring O atoms in L3CBO. The off-ring O atoms have more non-bonding  $2p$  states than that of the in-ring O atoms.



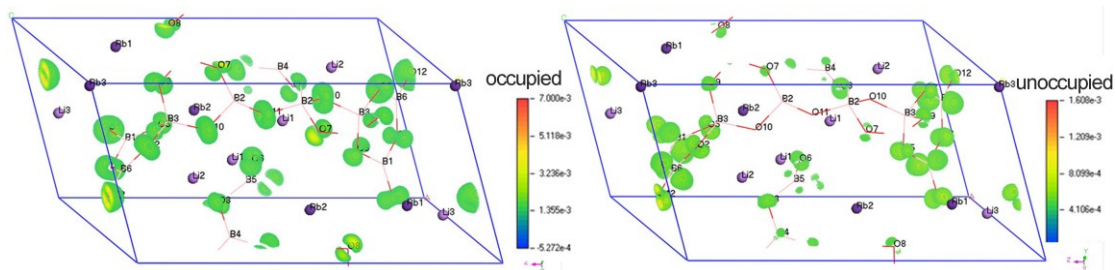

**Figure S6.** The SHG-density of occupied states (left) and unoccupied states (right) of L6RBO in the VE process.

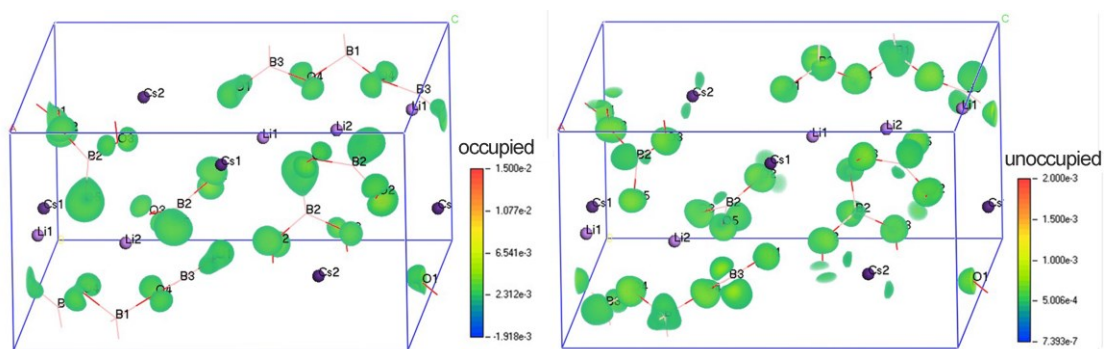

**Figure S7.** The SHG-density of occupied states (left) and unoccupied (right) states of L3CBO in the VE process.

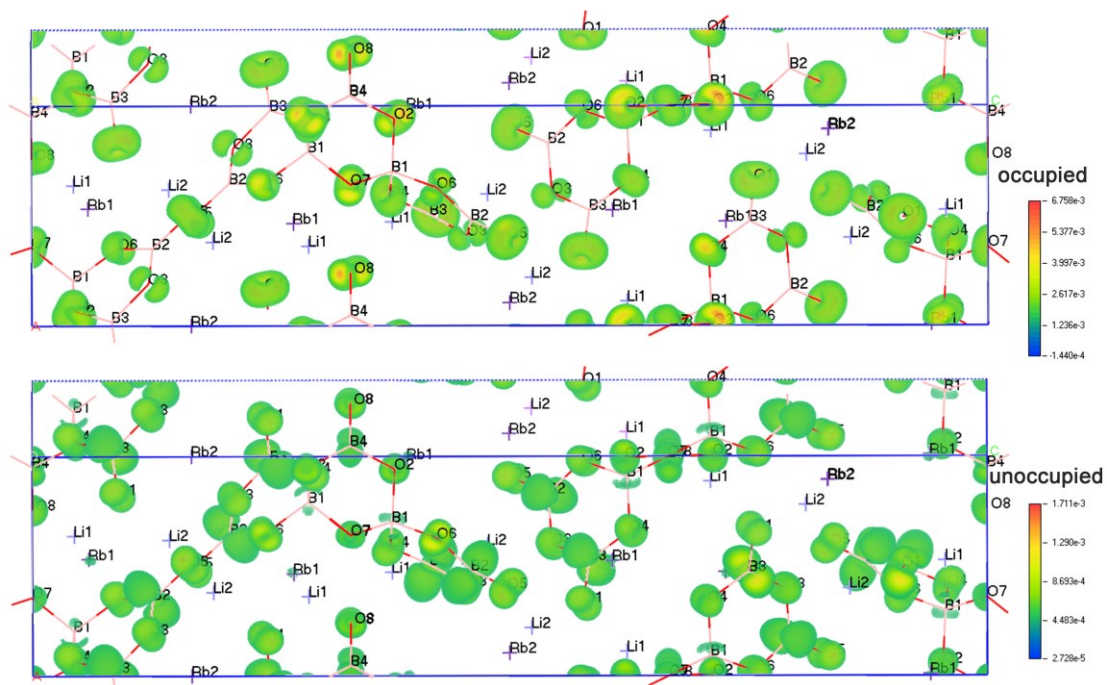

**Figure S8.** The SHG-density of occupied states (top) and unoccupied states (bottom) of L4RBO in the VE process.

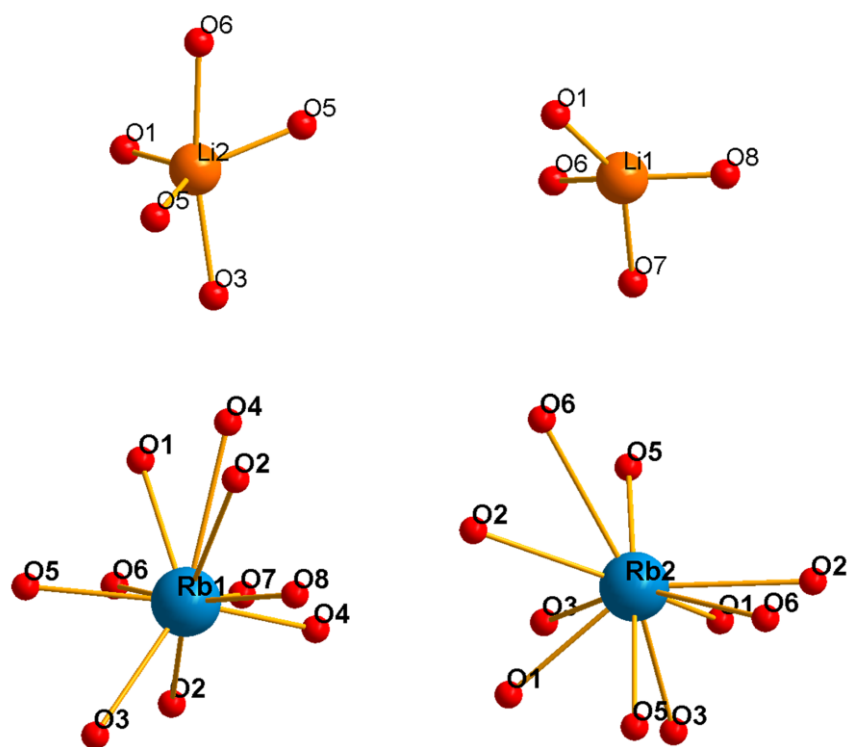

**Figure S9.** Coordination of oxygen atoms around Li and Rb.

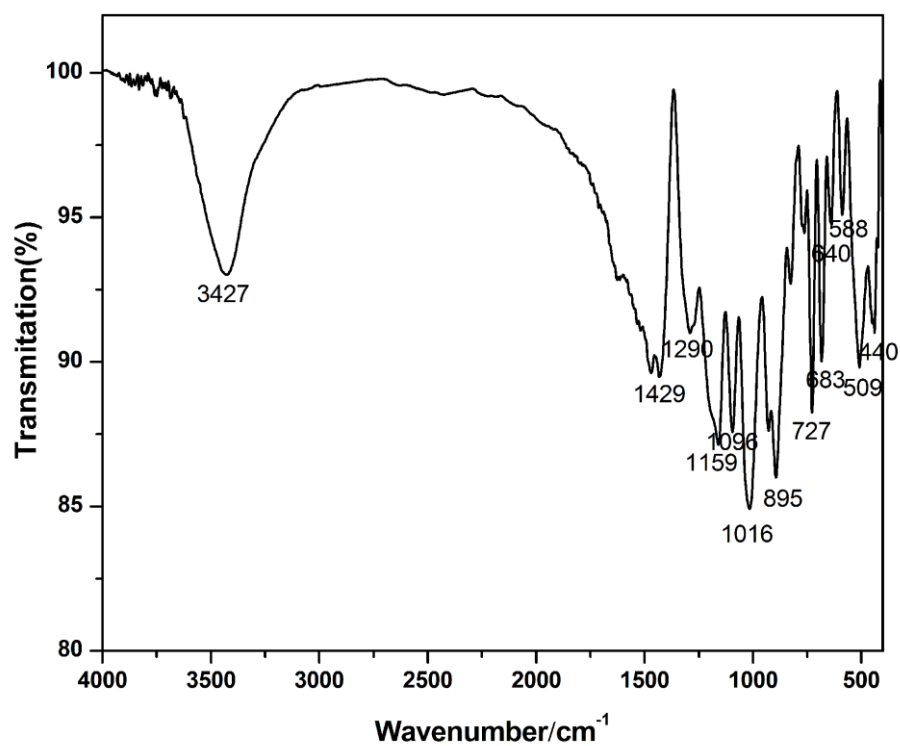

**Figure S10.** The IR spectrum of L4RBO.



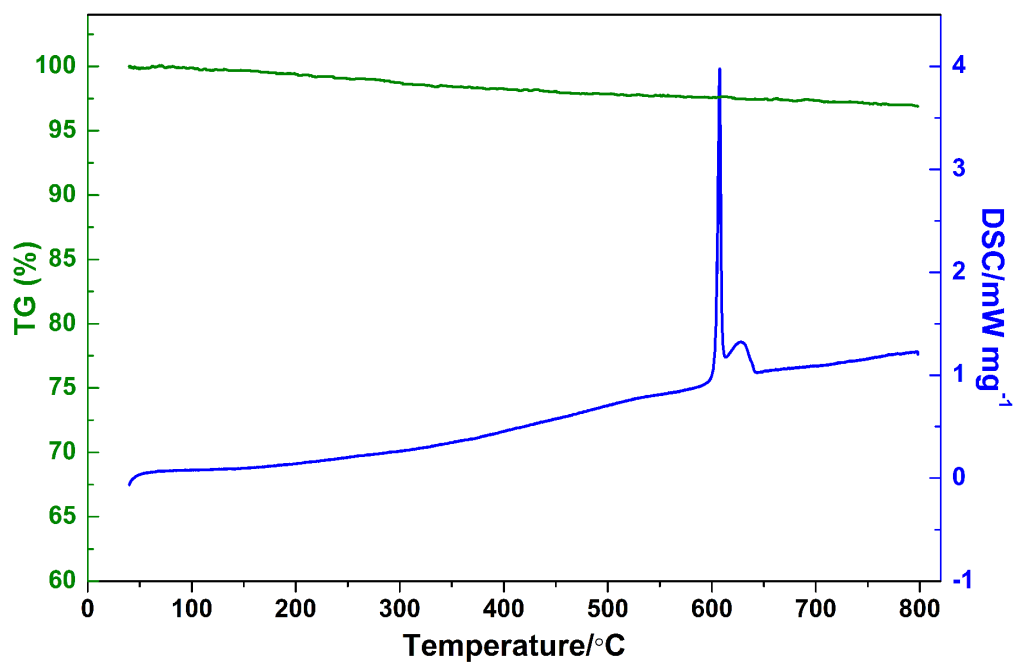

**Figure S11.** TG/DSC curve of  $\text{Li}_4\text{Rb}_3\text{B}_7\text{O}_{14}$ .

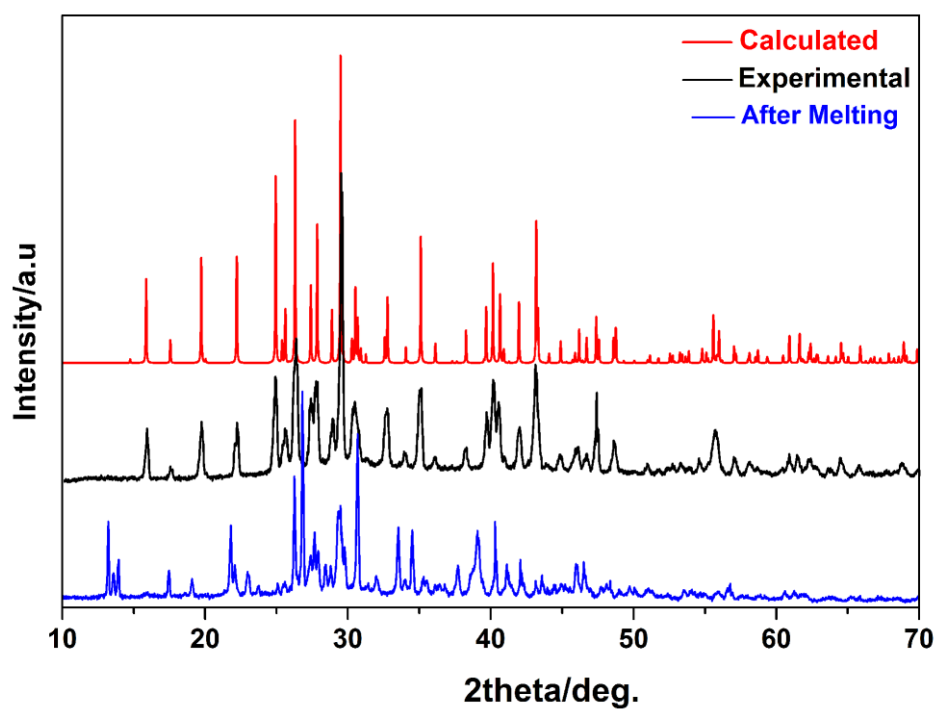

**Figure S12.** Experimental and calculated XRD patterns of L4RBO compared with the pattern after melting.

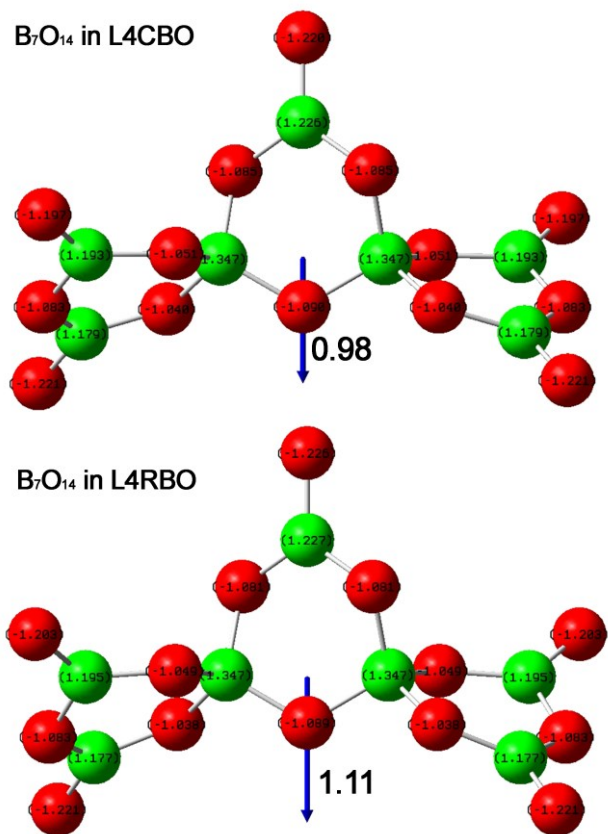

**Figure S13.** The charge distribution of B (green) and O (red) atoms of isolated B<sub>7</sub>O<sub>14</sub> group in L4CBO (top) and L4RBO (bottom) as well as the related dipole moment.

**Table S1.** Atomic coordinates ( $\times 10^4$ ) and equivalent isotropic displacement parameters ( $\text{\AA}^2 \times 10^3$ ) for  $\text{Li}_4\text{Rb}_3\text{B}_7\text{O}_{14}$ .  $U_{\text{eq}}$  is defined as one third of the trace of the orthogonalized  $U_{ij}$  tensor.

| Atom  | x       | y        | z       | $U_{\text{eq}}$ |
|-------|---------|----------|---------|-----------------|
| Rb(1) | 4658(1) | 9910(1)  | 594(1)  | 20(1)           |
| Rb(2) | 0       | 11058(1) | 1667    | 20(1)           |
| Li(1) | 3616(8) | 14739(8) | 439(2)  | 14(1)           |
| Li(2) | 3803(9) | 6001(8)  | 1437(2) | 14(1)           |
| B(1)  | 7937(6) | 7017(6)  | 436(1)  | 10(1)           |
| B(2)  | 6478(5) | 14799(5) | 1264(1) | 8(1)            |
| B(3)  | -198(6) | 5062(6)  | 836(1)  | 9(1)            |
| B(4)  | 478(8)  | 10478(8) | 0       | 18(1)           |
| O(1)  | 1703(3) | 5066(3)  | 895(1)  | 11(1)           |
| O(2)  | -530(3) | 9418(3)  | 460(1)  | 18(1)           |
| O(3)  | 8081(3) | 14114(3) | 1223(1) | 11(1)           |
| O(4)  | 5877(4) | 9265(4)  | -408(1) | 20(1)           |
| O(5)  | 4968(4) | 14001(3) | 1640(1) | 11(1)           |
| O(6)  | 6480(3) | 6275(3)  | 903(1)  | 10(1)           |
| O(7)  | 6413(4) | 6413(4)  | 0       | 9(1)            |
| O(8)  | 2414(5) | 12414(5) | 0       | 34(1)           |

**Table S2.** Bond lengths [ $\text{\AA}$ ] and angles [deg] for  $\text{Li}_4\text{Rb}_3\text{B}_7\text{O}_{14}$ .

|                     |            |                     |           |
|---------------------|------------|---------------------|-----------|
| Rb(1)-O(4)          | 2.8304(19) | B(2)-Li(2)#6        | 2.406(6)  |
| Rb(1)-O(5)#1        | 2.9524(19) | B(3)-O(1)           | 1.315(4)  |
| Rb(2)-O(5)          | 2.976(2)   | B(3)-O(4)#3         | 1.373(3)  |
| Li(1)-O(8)          | 1.793(5)   | B(3)-O(3)#12        | 1.435(4)  |
| Li(1)-O(1)#6        | 1.863(5)   | B(4)-O(8)           | 1.331(6)  |
| Li(1)-O(7)#6        | 2.027(5)   | B(4)-O(2)#9         | 1.389(3)  |
| Li(1)-O(6)#6        | 2.088(5)   | B(4)-O(2)           | 1.389(3)  |
| Li(1)-B(1)#6        | 2.574(6)   | O(1)-Li(1)#2        | 1.863(5)  |
| Li(1)-Li(1)#9       | 2.641(9)   | O(2)-B(1)#8         | 1.450(4)  |
| Li(1)-Li(2)#6       | 2.711(6)   | O(3)-B(3)#13        | 1.435(4)  |
| Li(2)-Li(1)#2       | 2.711(6)   | O(6)-Li(1)#2        | 2.088(5)  |
| B(1)-O(2)#10        | 1.450(4)   | O(7)-B(1)#11        | 1.454(3)  |
| B(1)-O(7)           | 1.454(3)   | O(7)-Li(1)#3        | 2.027(5)  |
| B(1)-O(4)#11        | 1.473(4)   | O(7)-Li(1)#2        | 2.027(5)  |
| B(1)-O(6)           | 1.489(3)   | O(8)-Li(1)#9        | 1.793(5)  |
| B(1)-Li(1)#2        | 2.574(6)   | B(2)-O(3)           | 1.403(3)  |
| B(2)-O(5)           | 1.326(4)   | B(2)-Li(2)#7        | 2.361(6)  |
| B(2)-O(6)#6         | 1.380(4)   |                     |           |
| O(4)-Rb(1)-O(5)#1   | 142.30(6)  | Li(1)#2-Rb(1)-B(3)  | 51.97(10) |
| O(3)-Rb(1)-O(8)     | 95.47(6)   | Li(2)-Rb(1)-B(3)    | 52.21(10) |
| O(4)-Rb(1)-Li(1)#2  | 68.89(9)   | O(4)#3-Rb(1)-B(3)   | 23.40(6)  |
| O(3)-Rb(1)-Li(2)    | 98.85(9)   | O(4)-Rb(1)-O(6)     | 81.63(5)  |
| O(8)-Rb(1)-Li(2)    | 144.95(10) | O(1)-Rb(1)-B(2)     | 131.99(6) |
| O(8)-Rb(1)-B(3)     | 96.56(8)   | O(1)#5-Rb(2)-O(3)#7 | 44.44(5)  |
| O(5)-Rb(2)-B(3)#5   | 84.08(7)   | O(1)#6-Rb(2)-O(3)#7 | 60.98(5)  |
| O(5)#4-Rb(2)-B(3)#5 | 86.24(7)   | O(3)#8-Rb(2)-O(2)#4 | 128.69(5) |
| B(3)#5-Rb(2)-B(3)#6 | 74.80(10)  | O(5)-Rb(2)-O(2)     | 95.95(5)  |
| O(7)#6-Li(1)-O(6)#6 | 69.43(17)  |                     |           |

1. Schevciw, O.; White, W. B., *Mater. Res. Bull.* **1983**, *18* (9), 1059-1068.
